# Supplementary material for: Enhancement of air-stability, π-stacking ability, and charge transport properties of fluoroalkyl side chain engineered n-type naphthalene tetracarboxylic diimide compounds
Source: Royal Society of Chemistry journal article supplement (doi:10.1039/d0ra08345c), 2020-12-22
Supplement: d0ra08345c1.pdf [file d0ra08345c1.pdf]

**Enhancement of air-stability,  $\pi$ -stacking ability and charge transport properties of fluoroalkyl side chain engineered Naphthalene tetracarboxylic diimide compounds**

Gautomi Gogoi<sup>a,c</sup>, Labanya Bhattacharya<sup>b</sup>, Smruti R Sahoo<sup>b</sup>, Sridhar Sahu<sup>b</sup>, Neelotpal Sen Sarma<sup>a</sup>, Sagar Sharma<sup>d\*</sup>

*a* Advanced Materials Laboratory, Physical Sciences Division, Institute of Advanced Study in Science and Technology, Vigyan Path, Paschim Boragaon, Guwahati-781035, Assam, India, Tel: +91-361-2270095

*b* High Performance Computing Lab, Department of Physics, Indian Institute of Technology (Indian School of Mines), Dhanbad, Jharkhand-826004, India

*c* Cotton University, College Hostel Road, Pan Bazaar, Guwahati-781001, Assam, India

*d* Department of Chemistry, School of Fundamental and Applied Sciences, Assam Don Bosco University, Tapesia Gardens, Guwahati-782402, Assam, India

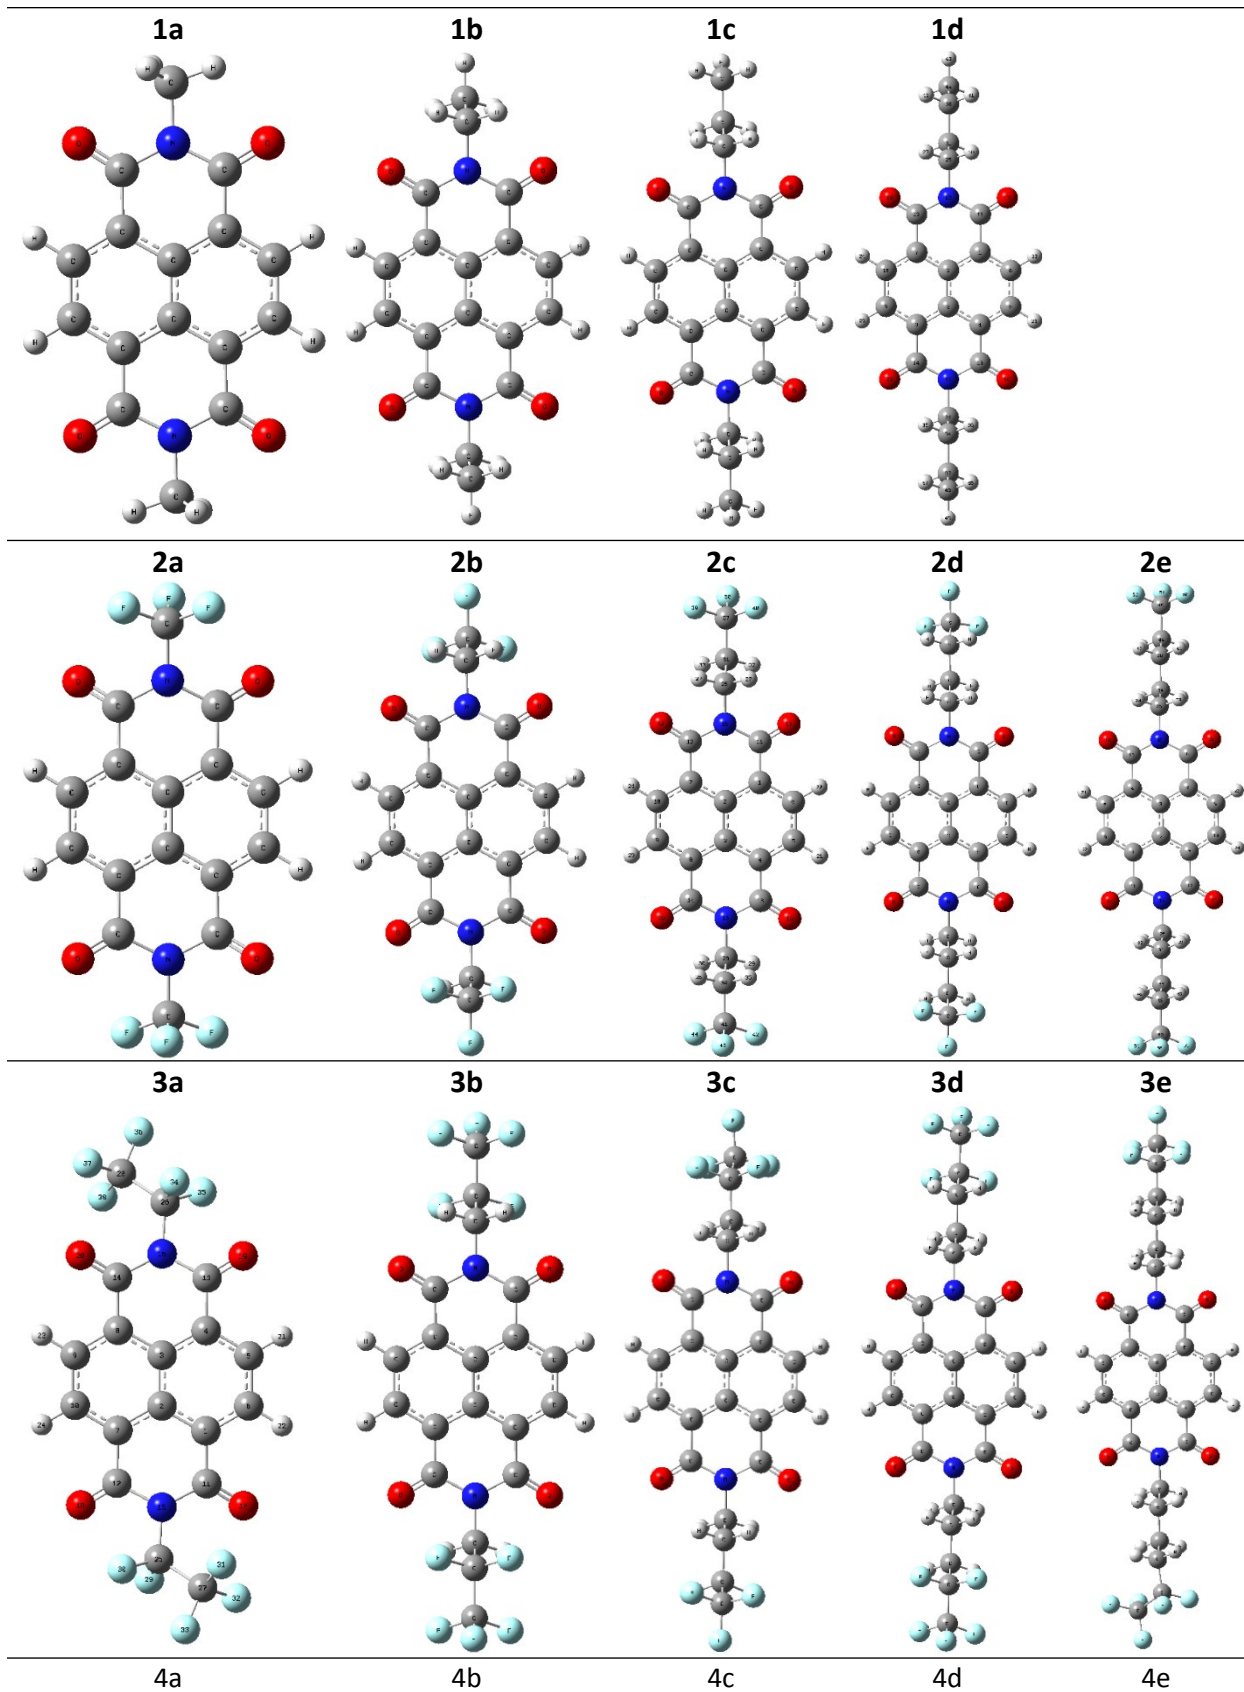

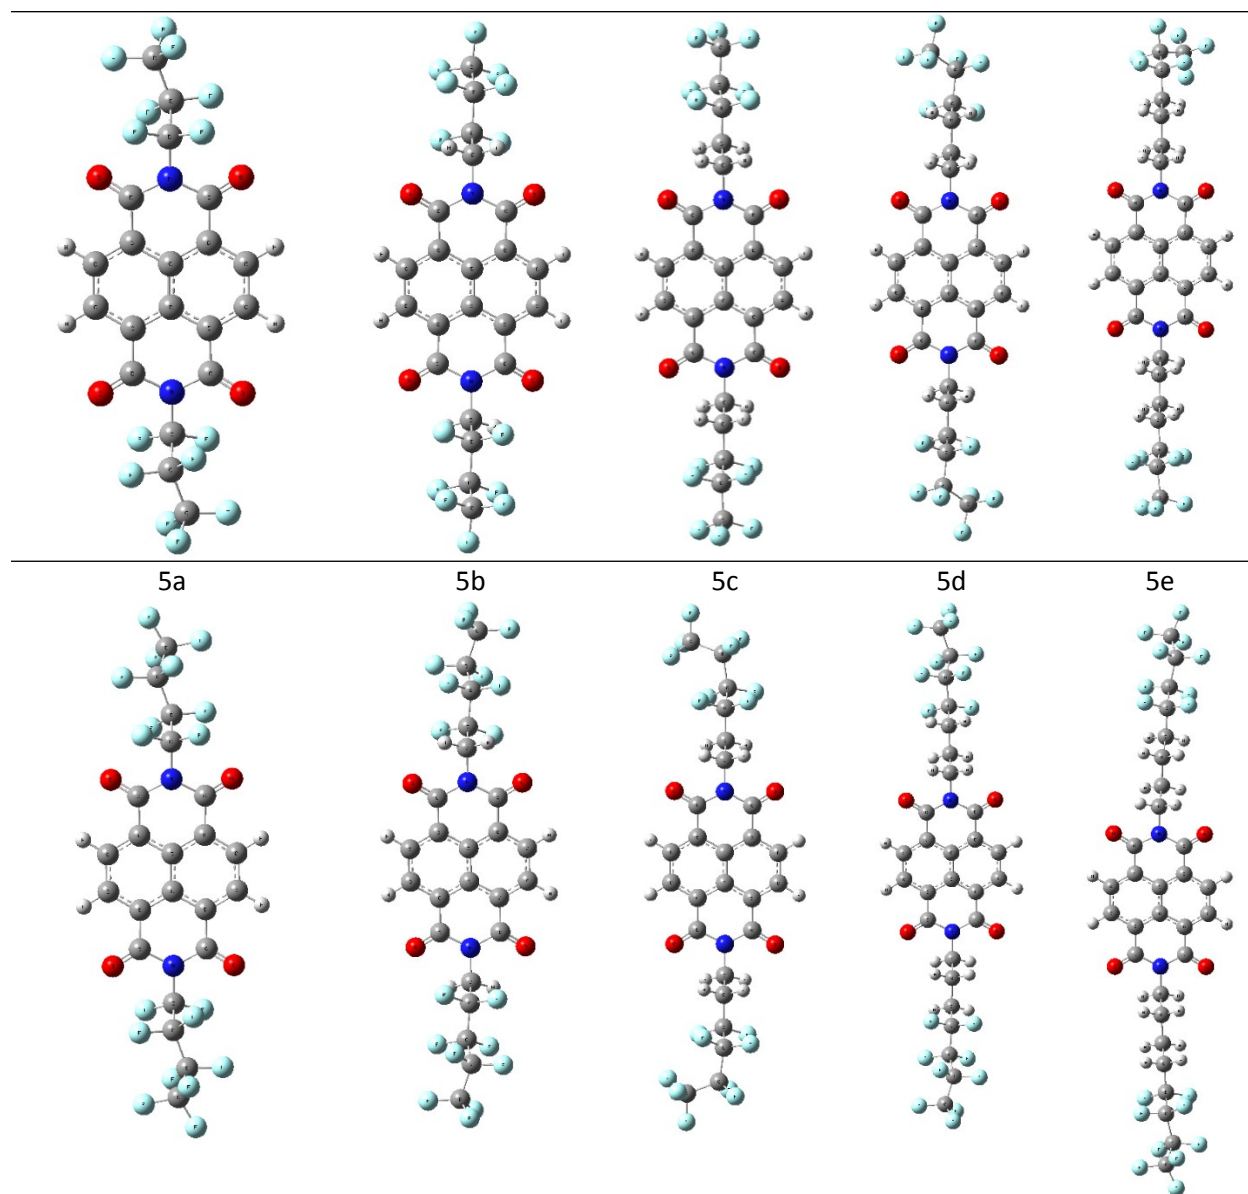

**Fig. S1** Optimized geometries of the studied compounds

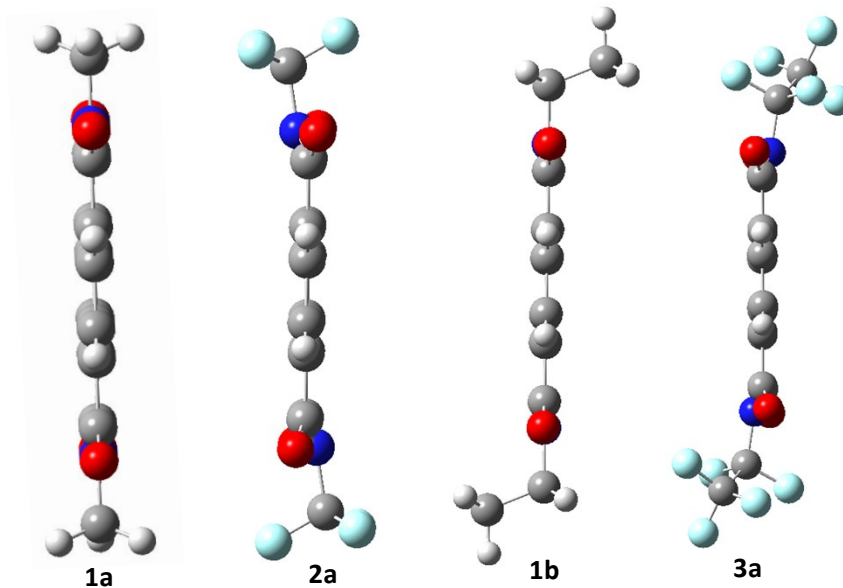

Fig. S2 Side view of four compounds

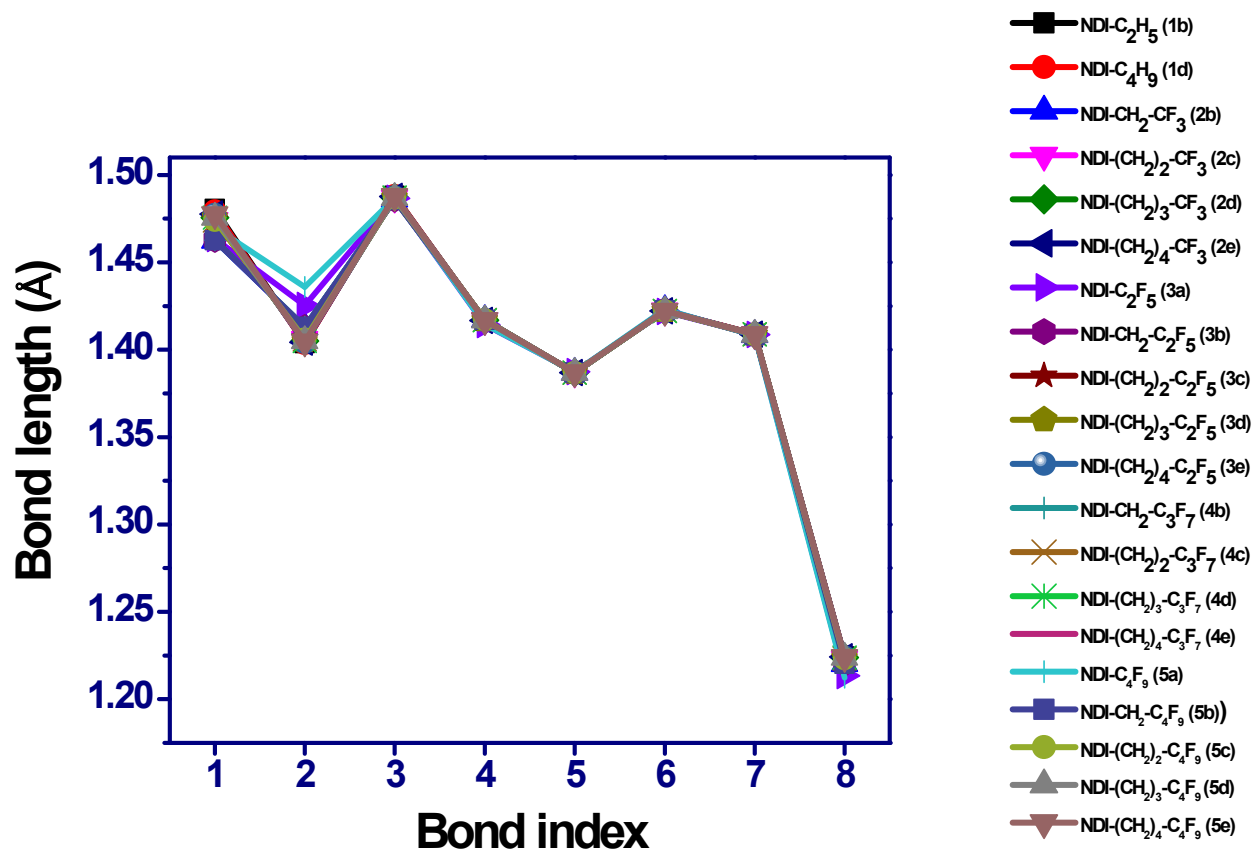

Fig. S3: Bond index of 20 compounds along the molecular backbone

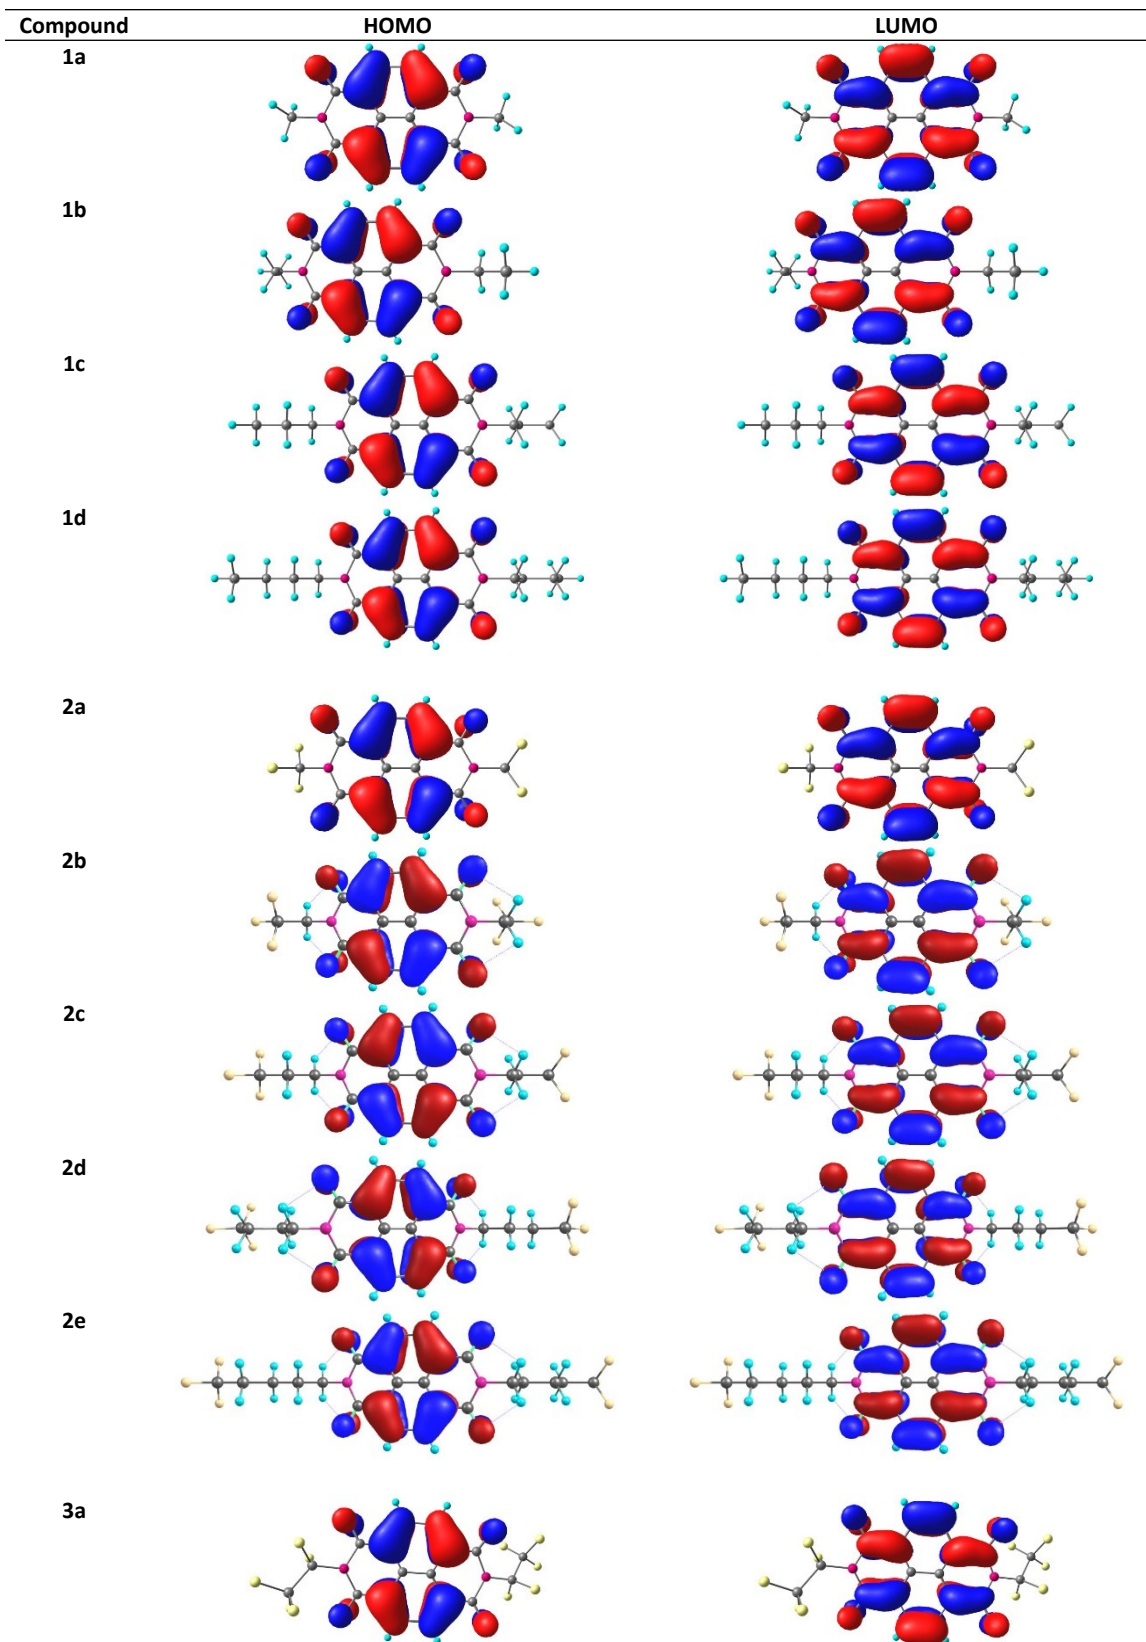

3b

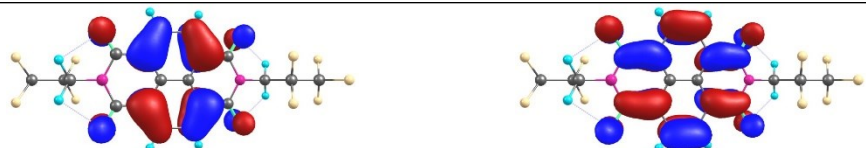

3c

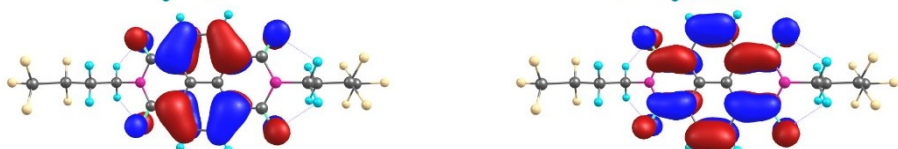

3d

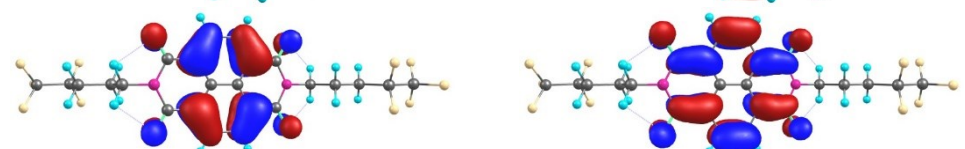

3e

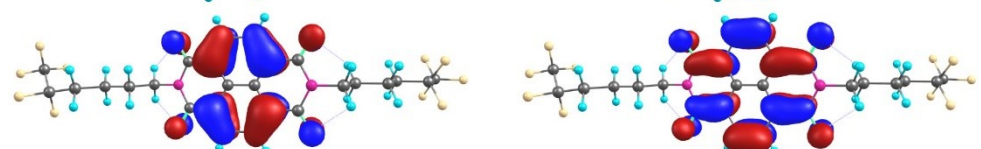

4a

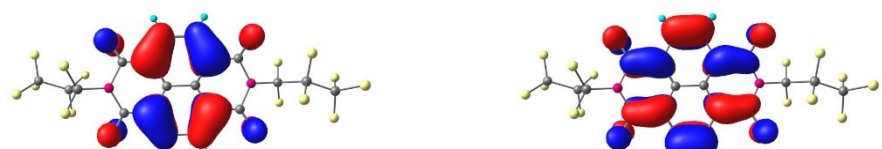

4b

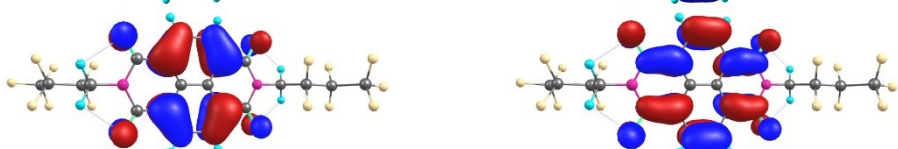

4c

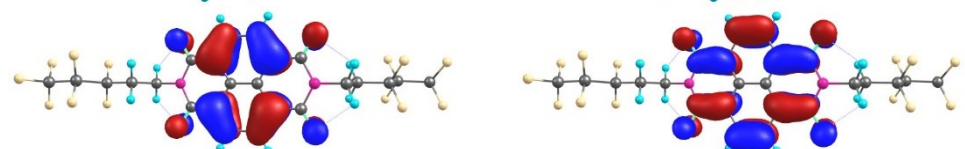

4d

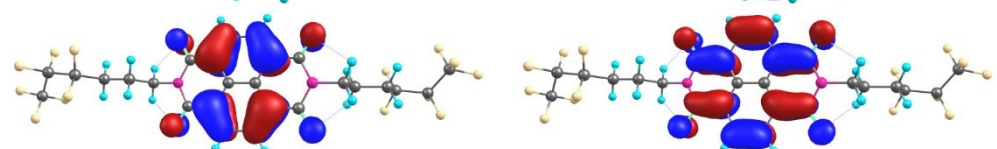

4e

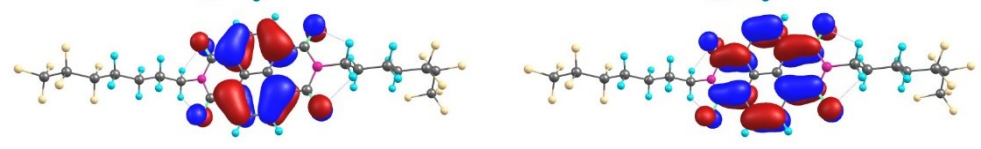

5a

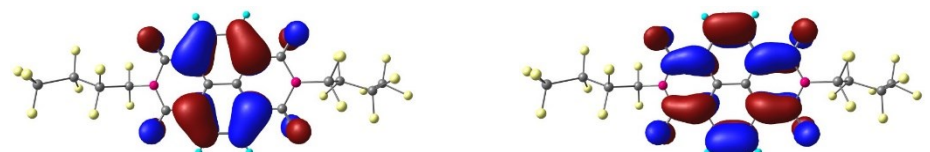

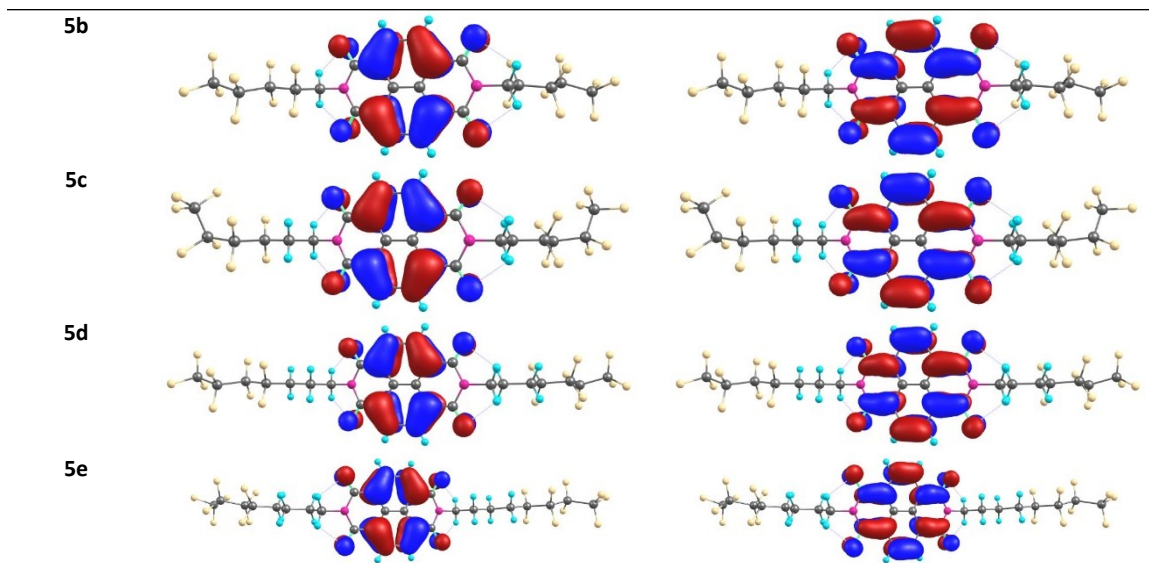

Fig. S4 Frontier molecular orbital plot of NDI-compounds

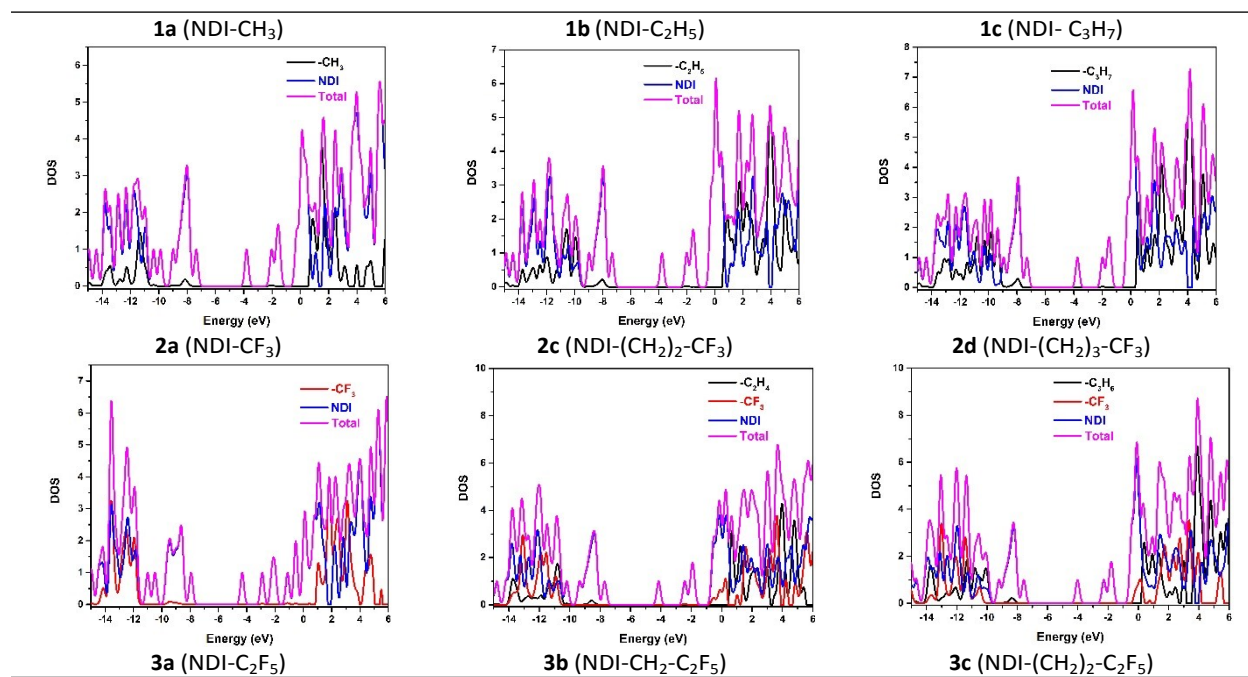

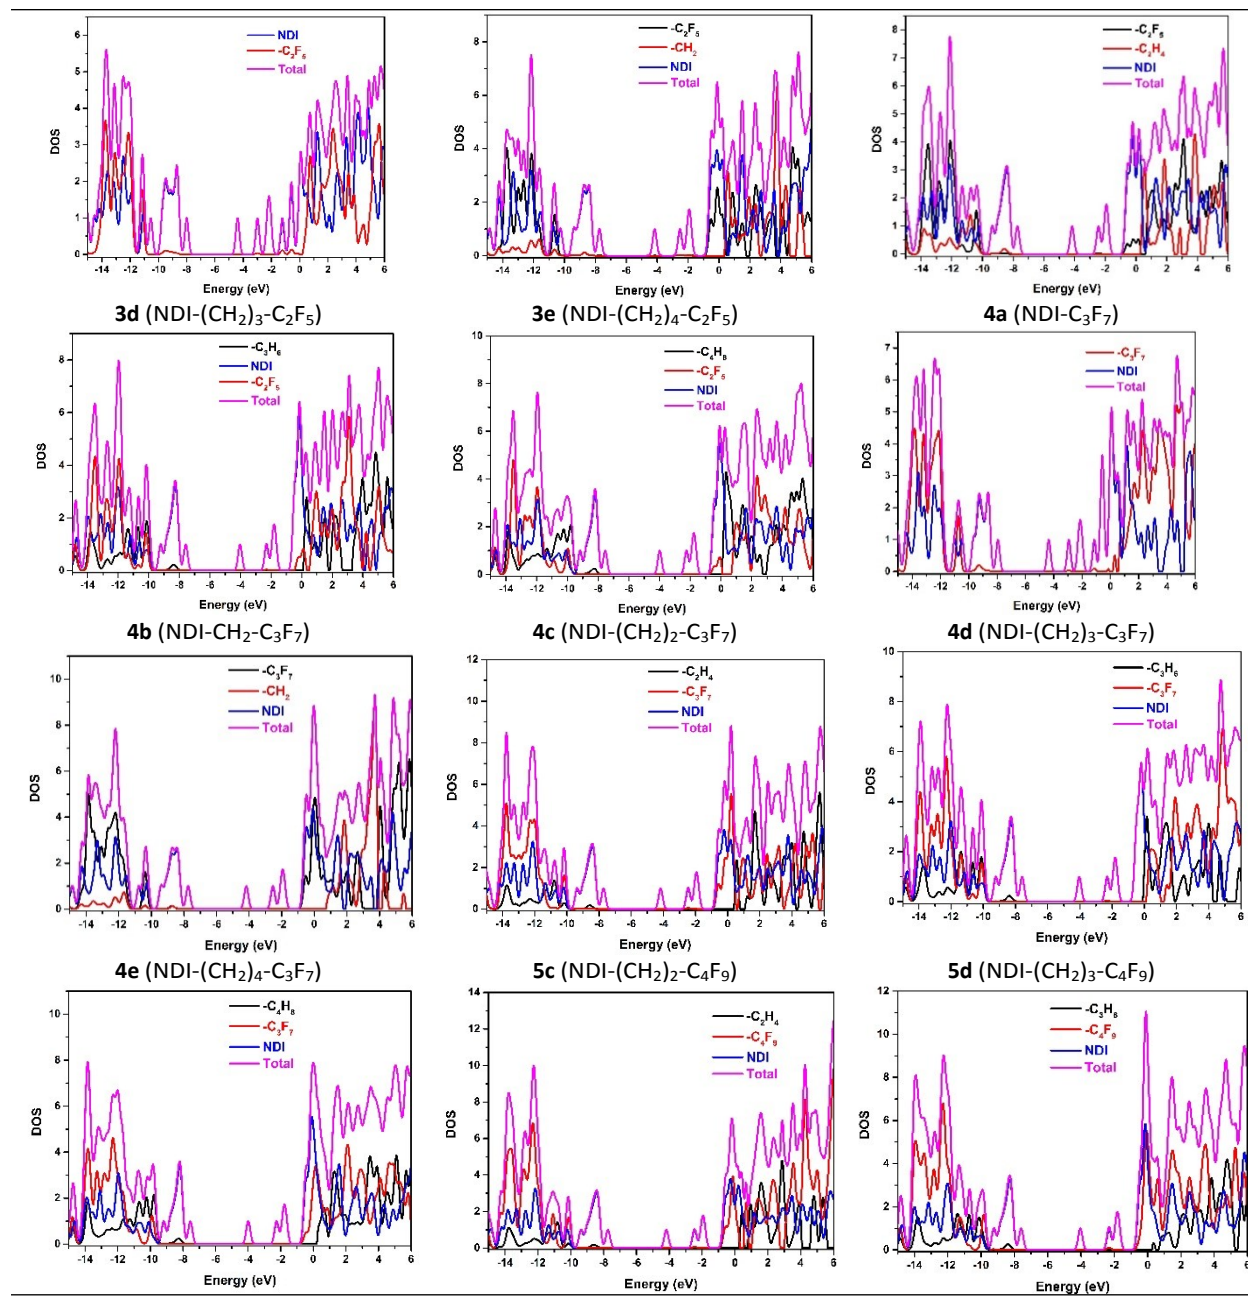

Fig. S5 Density of states of NDI-compounds



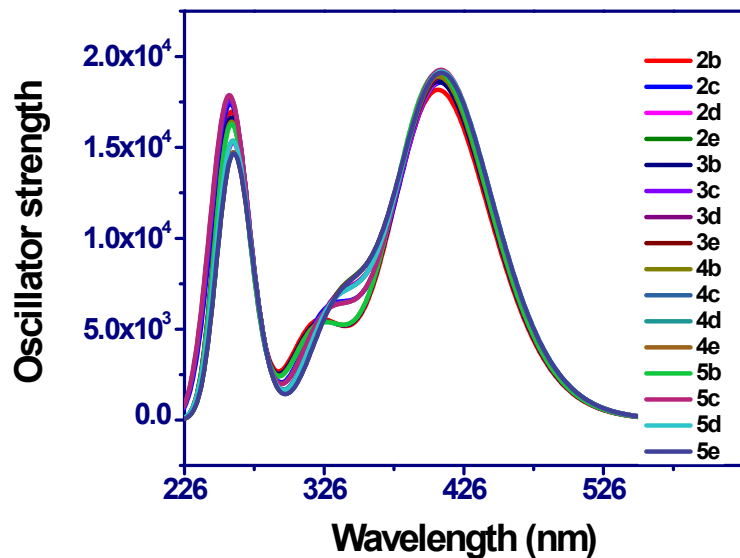

Fig. S6 Simulated absorption spectra of NDI-compounds at B3LYP/6-31+G(d,p) level in dichloromethane solvent

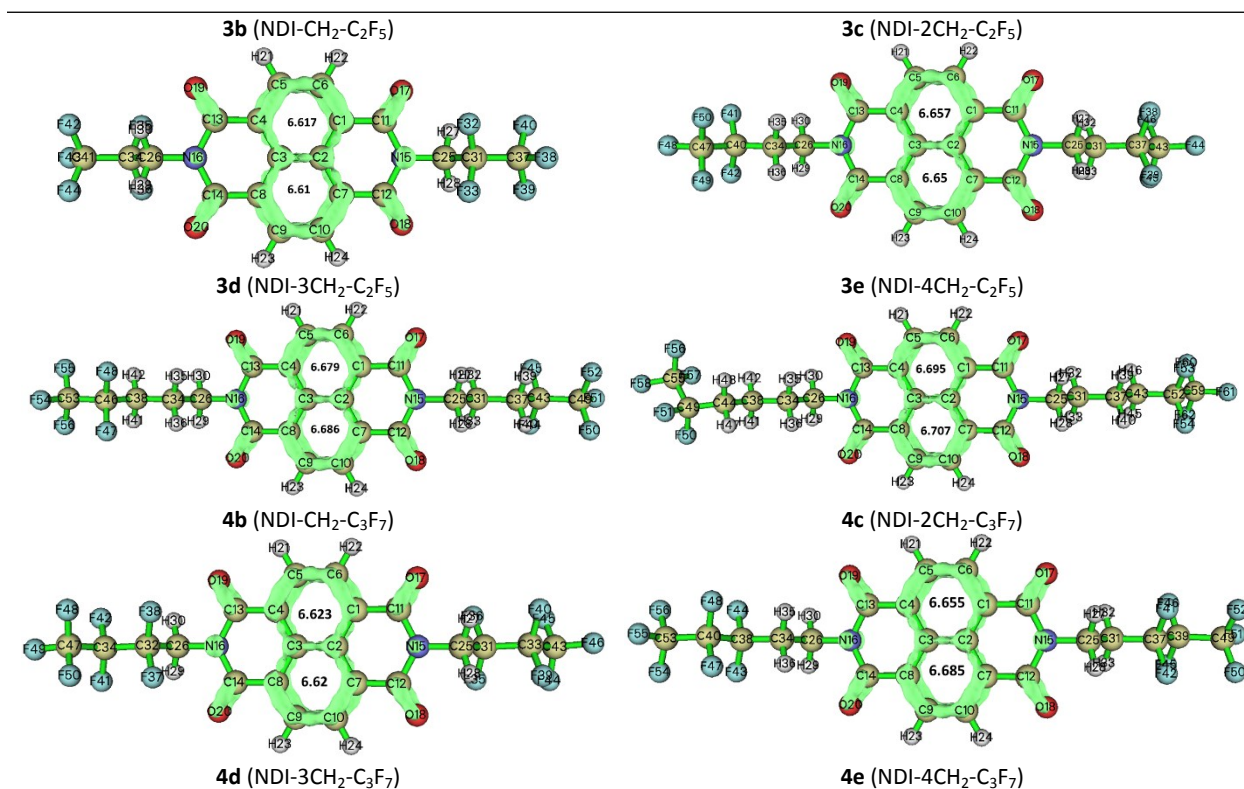

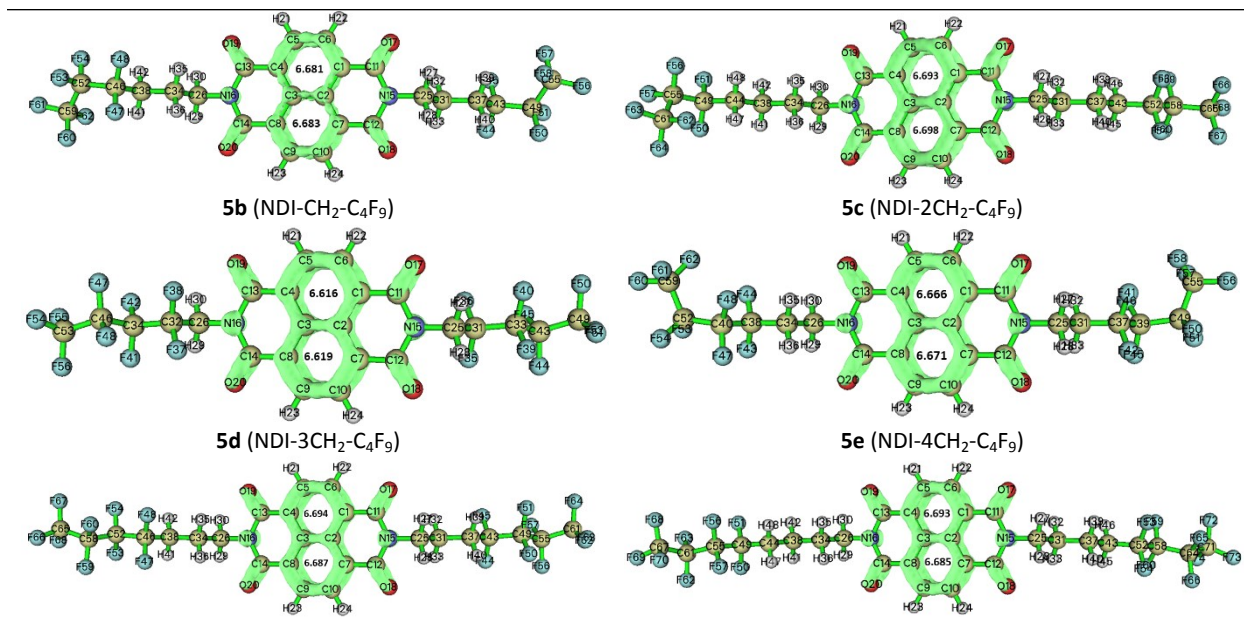

**Fig. S7** Localized orbital locator surface along with the LOLIPOP value for the studied compounds

Table S1 Bond index of the studied compounds along with the earlier reported crystal structure of six compounds with their references

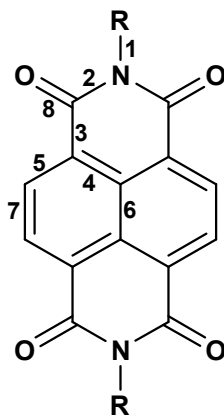

| Bond index | 1a                                      |
|------------|-----------------------------------------|
| 1          | 1.471 <sup>a</sup> (1.475) <sup>1</sup> |
| 2          | 1.405 <sup>a</sup> (1.388) <sup>1</sup> |
| 3          | 1.489 <sup>a</sup> (1.483) <sup>1</sup> |
| 4          | 1.417 <sup>a</sup> (1.406) <sup>1</sup> |
| 5          | 1.387 <sup>a</sup> (1.375) <sup>1</sup> |
| 6          | 1.422 <sup>a</sup> (1.415) <sup>1</sup> |
| 7          | 1.409 <sup>a</sup> (1.398) <sup>1</sup> |

|   |                                         |
|---|-----------------------------------------|
| 8 | 1.224 <sup>a</sup> (1.213) <sup>1</sup> |
|---|-----------------------------------------|

a : obtained at B3LYP/6-31+G(d,p) level of theory

| Bond index | <b>1b</b>                                                    |
|------------|--------------------------------------------------------------|
| 1          | 1.481 <sup>a</sup> (1.477) <sup>2</sup> (1.474) <sup>3</sup> |
| 2          | 1.404 <sup>a</sup> (1.394) <sup>2</sup> (1.387) <sup>3</sup> |
| 3          | 1.488 <sup>a</sup> (1.476) <sup>2</sup> (1.473) <sup>3</sup> |
| 4          | 1.416 <sup>a</sup> (1.410) <sup>2</sup> (1.397) <sup>3</sup> |
| 5          | 1.387 <sup>a</sup> (1.375) <sup>2</sup> (1.373) <sup>3</sup> |
| 6          | 1.422 <sup>a</sup> (1.405) <sup>2</sup> (1.404) <sup>3</sup> |
| 7          | 1.409 <sup>a</sup> (1.401) <sup>2</sup> (1.396) <sup>3</sup> |
| 8          | 1.224 <sup>a</sup> (1.215) <sup>2</sup> (1.210) <sup>3</sup> |

a : obtained at B3LYP/6-31+G(d,p) level of theory

| Bond index | <b>1c</b>                                                    |
|------------|--------------------------------------------------------------|
| 1          | 1.479 <sup>a</sup> (1.479) <sup>4</sup> (1.479) <sup>1</sup> |
| 2          | 1.404 <sup>a</sup> (1.397) <sup>4</sup> (1.398) <sup>1</sup> |
| 3          | 1.488 <sup>a</sup> (1.487) <sup>4</sup> (1.486) <sup>1</sup> |
| 4          | 1.416 <sup>a</sup> (1.417) <sup>4</sup> (1.411) <sup>1</sup> |
| 5          | 1.387 <sup>a</sup> (1.377) <sup>4</sup> (1.376) <sup>1</sup> |
| 6          | 1.422 <sup>a</sup> (1.413) <sup>4</sup> (1.413) <sup>1</sup> |
| 7          | 1.409 <sup>a</sup> (1.402) <sup>4</sup> (1.404) <sup>1</sup> |
| 8          | 1.224 <sup>a</sup> (1.216) <sup>4</sup> (1.211) <sup>1</sup> |

a : obtained at B3LYP/6-31+G(d,p) level of theory

| Bond index | <b>1d</b>                               |
|------------|-----------------------------------------|
| 1          | 1.479 <sup>a</sup> (1.486) <sup>5</sup> |
| 2          | 1.404 <sup>a</sup> (1.401) <sup>5</sup> |
| 3          | 1.488 <sup>a</sup> (1.481) <sup>5</sup> |
| 4          | 1.416 <sup>a</sup> (1.411) <sup>5</sup> |
| 5          | 1.387 <sup>a</sup> (1.381) <sup>5</sup> |
| 6          | 1.423 <sup>a</sup> (1.415) <sup>5</sup> |
| 7          | 1.409 <sup>a</sup> (1.402) <sup>5</sup> |
| 8          | 1.224 <sup>a</sup> (1.217) <sup>5</sup> |

a : obtained at B3LYP/6-31+G(d,p) level of theory

| Bond index | <b>4b</b>                                                    |
|------------|--------------------------------------------------------------|
| 1          | 1.463 <sup>a</sup> (1.468) <sup>6</sup> (1.460) <sup>7</sup> |
| 2          | 1.413 <sup>a</sup> (1.398) <sup>6</sup> (1.394) <sup>7</sup> |
| 3          | 1.486 <sup>a</sup> (1.477) <sup>6</sup> (1.486) <sup>7</sup> |
| 4          | 1.417 <sup>a</sup> (1.390) <sup>6</sup> (1.418) <sup>7</sup> |
| 5          | 1.387 <sup>a</sup> (1.380) <sup>6</sup> (1.369) <sup>7</sup> |
| 6          | 1.423 <sup>a</sup> (1.434) <sup>6</sup> (1.414) <sup>7</sup> |
| 7          | 1.409 <sup>a</sup> (1.402) <sup>6</sup> (1.400) <sup>7</sup> |
| 8          | 1.220 <sup>a</sup> (1.213) <sup>6</sup> (1.221) <sup>7</sup> |

a: obtained at B3LYP/6-31+G(d,p) level of theory

Table S2 Dihedrel angle of the studied compounds along with the earlier reported crystal structure of 6 compounds

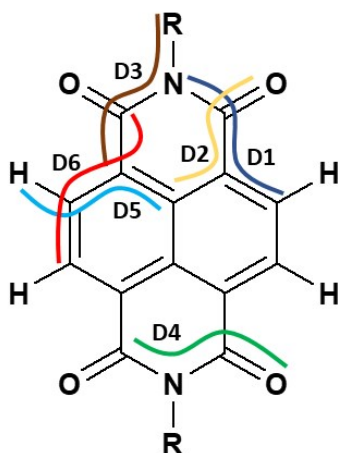

| Dihedrel angle | 1a (in °)                                 |
|----------------|-------------------------------------------|
| D1             | -179.9 <sup>a</sup> (-176.6) <sup>1</sup> |
| D2             | -179.9 <sup>a</sup> (-175.3) <sup>1</sup> |
| D3             | -179.9 <sup>a</sup> (-179.2) <sup>1</sup> |
| D4             | -179.9 <sup>a</sup> (179.4) <sup>1</sup>  |
| D5             | -179.9 <sup>a</sup> (-178.9) <sup>1</sup> |
| D6             | -180.0 <sup>a</sup> (-177.9) <sup>1</sup> |

a: obtained at B3LYP/6-31+G(d,p) level of theory

| Dihedrel angle | 1b (in °)                                                      |
|----------------|----------------------------------------------------------------|
| D1             | 179.1 <sup>a</sup> (177.2) <sup>2</sup> (176.9) <sup>3</sup>   |
| D2             | 179.3 <sup>a</sup> (177.0) <sup>2</sup> (177.1) <sup>3</sup>   |
| D3             | 179.4 <sup>a</sup> (177.3) <sup>2</sup> (177.1) <sup>3</sup>   |
| D4             | 178.2 <sup>a</sup> (-177.5) <sup>2</sup> (-177.5) <sup>3</sup> |
| D5             | 179.9 <sup>a</sup> (178.9) <sup>2</sup> (178.9) <sup>3</sup>   |
| D6             | 179.9 <sup>a</sup> (177.7) <sup>2</sup> (178.0) <sup>3</sup>   |

a: obtained at B3LYP/6-31+G(d,p) level of theory

| Dihedrel angle | 1c (in °)                                |
|----------------|------------------------------------------|
| D1             | 179.1 <sup>a</sup> (179.2) <sup>1</sup>  |
| D2             | 179.4 <sup>a</sup> (-179.5) <sup>1</sup> |
| D3             | 179.3 <sup>a</sup> (179.3) <sup>1</sup>  |
| D4             | 178.3 <sup>a</sup> (178.2) <sup>1</sup>  |
| D5             | 179.9 <sup>a</sup> (-179.8) <sup>1</sup> |
| D6             | 179.9 <sup>a</sup> (-179.4) <sup>1</sup> |

a : obtained at B3LYP/6-31+G(d,p) level of theory

| Dihedrel angle | 1d (in °)                                |
|----------------|------------------------------------------|
| D1             | 179.2 <sup>a</sup> (-177.4) <sup>5</sup> |
| D2             | 179.3 <sup>a</sup> (-175.4) <sup>5</sup> |
| D3             | 179.5 <sup>a</sup> (177.1) <sup>5</sup>  |
| D4             | 178.4 <sup>a</sup> (-179.4) <sup>5</sup> |
| D5             | 179.9 <sup>a</sup> (-179.4) <sup>5</sup> |
| D6             | 179.9 <sup>a</sup> (-179.3) <sup>5</sup> |

a : obtained at B3LYP/6-31+G(d,p) level of theory

| Dihedrel angle | 4b (in °)                                                     |
|----------------|---------------------------------------------------------------|
| D1             | 175.7 <sup>a</sup> (173.7) <sup>6</sup> (-174.4) <sup>7</sup> |
| D2             | 175.8 <sup>a</sup> (175.3) <sup>6</sup> (-172.4) <sup>7</sup> |
| D3             | 178.4 <sup>a</sup> (174.4) <sup>6</sup> (178.6) <sup>7</sup>  |
| D4             | 170.9 <sup>a</sup> (171.2) <sup>6</sup> (-173.4) <sup>7</sup> |
| D5             | 179.9 <sup>a</sup> (179.4) <sup>6</sup> (-178.6) <sup>7</sup> |
| D6             | 179.6 <sup>a</sup> (178.6) <sup>6</sup> (-178.0) <sup>7</sup> |

a : obtained at B3LYP/6-31+G(d,p) level of theory

Table S3 HOMO, LUMO and band gap values in eV for all the studied compounds at B3LYP/6-31+G(d,p) level

| Compound  | HOMO                       | LUMO                       | Band gap                 |
|-----------|----------------------------|----------------------------|--------------------------|
| <b>1a</b> | -7.35                      | -3.78                      | 3.57                     |
| <b>1b</b> | -7.30                      | -3.74                      | 3.56                     |
| <b>1c</b> | -7.29                      | -3.73                      | 3.56                     |
| <b>1d</b> | -7.28                      | -3.72                      | 3.56                     |
| <b>2a</b> | -7.92                      | -4.31                      | 3.61                     |
| <b>2b</b> | -7.71                      | -4.14                      | 3.57                     |
| <b>2c</b> | -7.69                      | -4.13                      | 3.56                     |
| <b>2d</b> | -7.56                      | -4.00                      | 3.56                     |
| <b>2e</b> | -7.52                      | -3.96                      | 3.56                     |
| <b>3a</b> | -7.92                      | -4.33                      | 3.59                     |
| <b>3b</b> | -7.72                      | -4.15                      | 3.57                     |
| <b>3c</b> | -7.71                      | -4.15                      | 3.56                     |
| <b>3d</b> | -7.57                      | -4.01                      | 3.56                     |
| <b>3e</b> | -7.53                      | -3.97                      | 3.56                     |
| <b>4a</b> | -7.93                      | -4.34                      | 3.59                     |
| <b>4b</b> | -7.73 (-6.84) <sup>8</sup> | -4.16 (-3.72) <sup>8</sup> | 3.57 (3.12) <sup>8</sup> |
| <b>4c</b> | -7.71                      | -4.15                      | 3.56                     |
| <b>4d</b> | -7.58                      | -4.02                      | 3.56                     |
| <b>4e</b> | -7.53                      | -3.98                      | 3.56                     |
| <b>5a</b> | -7.94                      | -4.34                      | 3.59                     |
| <b>5b</b> | -7.74                      | -4.16                      | 3.57                     |
| <b>5c</b> | -7.72                      | -4.16                      | 3.56                     |
| <b>5d</b> | -7.58                      | -4.03                      | 3.56                     |
| <b>5e</b> | -7.54                      | -3.98                      | 3.56                     |

Table S4 Computed electronic transition energy (E), absorption wavelength ( $\lambda$ ), oscillator strength ( $f$ ) and transition and major composition for dominant excitations in dichloromethane solvent b3lyp/6-31+G(d,p) level

| Compound  | State | E (eV) | $\lambda$ (nm) | f      | Major Configuration |
|-----------|-------|--------|----------------|--------|---------------------|
| <b>2b</b> | S1    | 3.2197 | 385            | 0.4107 | HOMO->LUMO (98%)    |
|           | S15   | 5.3065 | 234            | 0.4167 | HOMO->L+3 (83%)     |
| <b>2c</b> | S1    | 3.2115 | 386            | 0.4294 | HOMO->LUMO (99%)    |
|           | S14   | 5.2814 | 235            | 0.3775 | HOMO->L+3 (82%)     |
| <b>2d</b> | S1    | 3.2105 | 386            | 0.4363 | HOMO->LUMO (99%)    |
|           | S14   | 5.2675 | 235            | 0.353  | HOMO->L+2 (81%)     |
| <b>2e</b> | S1    | 3.2108 | 386            | 0.4409 | HOMO->LUMO (99%)    |
|           | S15   | 5.2582 | 236            | 0.3371 | HOMO->L+2 (80%)     |
| <b>3b</b> | S1    | 3.2197 | 385            | 0.4221 | HOMO->LUMO (98%)    |
|           | S15   | 5.3053 | 234            | 0.4081 | HOMO->L+3 (83%)     |
| <b>3c</b> | S1    | 3.2110 | 386            | 0.437  | HOMO->LUMO (99%)    |
|           | S14   | 5.2815 | 235            | 0.3726 | HOMO->L+3 (82%)     |
| <b>3d</b> | S1    | 3.2101 | 386            | 0.4423 | HOMO->LUMO (99%)    |
|           | S14   | 5.2677 | 235            | 0.3516 | HOMO->L+2 (81%)     |
| <b>3e</b> | S1    | 3.2104 | 386            | 0.4456 | HOMO->LUMO (99%)    |
|           | S14   | 5.2584 | 236            | 0.3358 | HOMO->L+2 (80%)     |
| <b>4b</b> | S1    | 3.2194 | 385            | 0.4295 | HOMO->LUMO (98%)    |
|           | S15   | 5.3046 | 234            | 0.402  | HOMO->L+3 (83%)     |
| <b>4c</b> | S1    | 3.2106 | 386            | 0.4433 | HOMO->LUMO (99%)    |
|           | S14   | 5.2814 | 235            | 0.3705 | HOMO->L+3 (82%)     |
| <b>4d</b> | S1    | 3.2101 | 386            | 0.4472 | HOMO->LUMO (99%)    |
|           | S14   | 5.2676 | 235            | 0.3508 | HOMO->L+2 (81%)     |
| <b>4e</b> | S1    | 3.2103 | 386            | 0.4478 | HOMO->LUMO (99%)    |
|           | S15   | 5.2579 | 236            | 0.3161 | HOMO->L+2 (76%)     |

|           |     |        |     |        |                  |
|-----------|-----|--------|-----|--------|------------------|
| <b>5b</b> | S1  | 3.2189 | 385 | 0.4353 | HOMO->LUMO (98%) |
|           | S15 | 5.3039 | 234 | 0.3982 | HOMO->L+3 (83%)  |
| <b>5c</b> | S1  | 3.2104 | 386 | 0.4472 | HOMO->LUMO (99%) |
|           | S15 | 5.2811 | 235 | 0.3673 | HOMO->L+3 (81%)  |
| <b>5d</b> | S1  | 3.2096 | 386 | 0.4497 | HOMO->LUMO (99%) |
|           | S14 | 5.2674 | 235 | 0.3481 | HOMO->L+2 (81%)  |
| <b>5e</b> | S1  | 3.2099 | 386 | 0.45   | HOMO->LUMO (99%) |
|           | S15 | 5.2573 | 236 | 0.3102 | HOMO->L+2 (75%)  |

Table S5 Computed electronic transition energy (E), absorption wavelength ( $\lambda$ ), oscillator strength (f) and transition and major composition for dominant excitations in dichloromethane solvent at cam-b3lyp/6-31+G(d,p) level

| Compound                                                          | State | E (eV) | $\lambda$ (nm) | f      | Major Configuration |
|-------------------------------------------------------------------|-------|--------|----------------|--------|---------------------|
| <b>1a</b> (NDI-CH <sub>3</sub> )                                  | S1    | 3.5491 | 349            | 0.4877 | HOMO->LUMO (98%)    |
|                                                                   | S12   | 5.6673 | 219            | 0.8051 | HOMO->L+2 (79%)     |
| <b>1b</b> (NDI-C <sub>2</sub> H <sub>5</sub> )                    | S1    | 3.5437 | 350            | 0.5063 | HOMO->LUMO (98%)    |
|                                                                   | S12   | 5.6577 | 219            | 0.7772 | HOMO->L+2 (79%)     |
| <b>1c</b> (NDI- C <sub>3</sub> H <sub>7</sub> )                   | S1    | 3.5423 | 350            | 0.5227 | HOMO->LUMO (98%)    |
|                                                                   | S12   | 5.6528 | 219            | 0.7535 | HOMO->L+2 (79%)     |
|                                                                   | S19   | 6.4413 | 192            | 0.3441 | H-2->L+1 (39%)      |
| <b>1d</b> (NDI-C <sub>4</sub> H <sub>9</sub> )                    | S1    | 3.5422 | 350            | 0.5297 | HOMO->LUMO (98%)    |
|                                                                   | S12   | 5.6517 | 219            | 0.7424 | HOMO->L+2 (80%)     |
|                                                                   | S19   | 6.4400 | 193            | 0.3762 | H-2->L+1 (39%)      |
| <b>2a</b> (NDI-CF <sub>3</sub> )                                  | S1    | 3.5947 | 345            | 0.477  | HOMO->LUMO (98%)    |
|                                                                   | S12   | 5.8073 | 213            | 0.9293 | HOMO->L+2 (46%)     |
| <b>2b</b> (NDI-CH <sub>2</sub> -CF <sub>3</sub> )                 | S1    | 3.5547 | 349            | 0.507  | HOMO->LUMO (98%)    |
|                                                                   | S12   | 5.7013 | 217            | 0.832  | HOMO->L+2 (76%)     |
| <b>2c</b> (NDI-(CH <sub>2</sub> ) <sub>2</sub> -CF <sub>3</sub> ) | S1    | 3.5431 | 350            | 0.5240 | HOMO->LUMO (98%)    |
|                                                                   | S12   | 5.6790 | 218            | 0.7959 | HOMO->L+2 (78%)     |
| <b>2d</b> (NDI-(CH <sub>2</sub> ) <sub>3</sub> -CF <sub>3</sub> ) | S1    | 3.5413 | 350            | 0.5308 | HOMO->LUMO (98%)    |
|                                                                   | S12   | 5.6659 | 219            | 0.7678 | HOMO->L+2 (79%)     |
| <b>2e</b> (NDI-(CH <sub>2</sub> ) <sub>4</sub> -CF <sub>3</sub> ) | S1    | 3.5417 | 350            | 0.5359 | HOMO->LUMO (98%)    |
|                                                                   | S12   | 5.6581 | 219            | 0.7515 | HOMO->L+2 (79%)     |
|                                                                   | S19   | 6.4511 | 192            | 0.3067 | H-2->L+1 (36%)      |



|                                                                                 |     |        |     |        |                  |
|---------------------------------------------------------------------------------|-----|--------|-----|--------|------------------|
| <b>3a</b> (NDI-C <sub>2</sub> F <sub>5</sub> )                                  | S1  | 3.5746 | 347 | 0.4994 | HOMO->LUMO (98%) |
|                                                                                 | S12 | 5.7767 | 215 | 0.9017 | HOMO->L+2 (54%)  |
| <b>3b</b> (NDI-CH <sub>2</sub> -C <sub>2</sub> F <sub>5</sub> )                 | S1  | 3.5552 | 349 | 0.5215 | HOMO->LUMO (98%) |
|                                                                                 | S12 | 5.6996 | 218 | 0.8148 | HOMO->L+2 (76%)  |
| <b>3c</b> (NDI-(CH <sub>2</sub> ) <sub>2</sub> -C <sub>2</sub> F <sub>5</sub> ) | S1  | 3.5428 | 350 | 0.533  | HOMO->LUMO (98%) |
|                                                                                 | S12 | 5.6790 | 218 | 0.7857 | HOMO->L+2 (78%)  |
| <b>3d</b> (NDI-(CH <sub>2</sub> ) <sub>3</sub> -C <sub>2</sub> F <sub>5</sub> ) | S1  | 3.5410 | 350 | 0.5378 | HOMO->LUMO (98%) |
|                                                                                 | S12 | 5.6660 | 219 | 0.7639 | HOMO->L+2 (79%)  |
| <b>3e</b> (NDI-(CH <sub>2</sub> ) <sub>4</sub> -C <sub>2</sub> F <sub>5</sub> ) | S1  | 3.5413 | 350 | 0.5416 | HOMO->LUMO (98%) |
|                                                                                 | S12 | 5.6582 | 219 | 0.7487 | HOMO->L+2 (79%)  |
|                                                                                 | S19 | 6.4511 | 192 | 0.3174 | H-2->L+1 (36%)   |
| <b>4a</b> (NDI-C <sub>3</sub> F <sub>7</sub> )                                  | S1  | 3.5766 | 347 | 0.5154 | HOMO->LUMO (98%) |
|                                                                                 | S12 | 5.7766 | 215 | 0.8832 | HOMO->L+2 (54%)  |
| <b>4b</b> (NDI-CH <sub>2</sub> -C <sub>3</sub> F <sub>7</sub> )                 | S1  | 3.5548 | 349 | 0.5297 | HOMO->LUMO (98%) |
|                                                                                 | S12 | 5.6986 | 218 | 0.8045 | HOMO->L+2 (76%)  |
| <b>4c</b> (NDI-(CH <sub>2</sub> ) <sub>2</sub> -C <sub>3</sub> F <sub>7</sub> ) | S1  | 3.5423 | 350 | 0.5402 | HOMO->LUMO (98%) |
|                                                                                 | S12 | 5.6788 | 218 | 0.7804 | HOMO->L+2 (78%)  |
| <b>4d</b> (NDI-(CH <sub>2</sub> ) <sub>3</sub> -C <sub>3</sub> F <sub>7</sub> ) | S1  | 3.5410 | 350 | 0.5436 | HOMO->LUMO (98%) |
|                                                                                 | S12 | 5.6661 | 219 | 0.7602 | HOMO->L+2 (79%)  |
| <b>4e</b> (NDI-(CH <sub>2</sub> ) <sub>4</sub> -C <sub>3</sub> F <sub>7</sub> ) | S1  | 3.5411 | 350 | 0.544  | HOMO->LUMO (98%) |
|                                                                                 | S12 | 5.6578 | 219 | 0.7461 | HOMO->L+2 (79%)  |
|                                                                                 | S19 | 6.4485 | 192 | 0.3321 | H-2->L+1 (37%)   |
| <b>5a</b> (NDI-C <sub>4</sub> F <sub>9</sub> )                                  | S1  | 3.5763 | 347 | 0.5257 | HOMO->LUMO (98%) |
|                                                                                 | S12 | 5.7747 | 215 | 0.8722 | HOMO->L+2 (54%)  |
| <b>5b</b> (NDI-CH <sub>2</sub> -C <sub>4</sub> F <sub>9</sub> )                 | S1  | 3.5542 | 349 | 0.5363 | HOMO->LUMO (98%) |
|                                                                                 | S12 | 5.6981 | 218 | 0.7989 | HOMO->L+2 (76%)  |
| <b>5c</b> (NDI-(CH <sub>2</sub> ) <sub>2</sub> -C <sub>4</sub> F <sub>9</sub> ) | S1  | 3.5421 | 350 | 0.5449 | HOMO->LUMO (98%) |
|                                                                                 | S12 | 5.6785 | 218 | 0.7771 | HOMO->L+2 (78%)  |
| <b>5d</b> (NDI-(CH <sub>2</sub> ) <sub>3</sub> -C <sub>4</sub> F <sub>9</sub> ) | S1  | 3.5405 | 350 | 0.546  | HOMO->LUMO (98%) |
|                                                                                 | S12 | 5.6658 | 219 | 0.757  | HOMO->L+2 (79%)  |
| <b>5e</b> (NDI-(CH <sub>2</sub> ) <sub>4</sub> -C <sub>4</sub> F <sub>9</sub> ) | S1  | 3.5407 | 350 | 0.5463 | HOMO->LUMO (98%) |
|                                                                                 | S12 | 5.6577 | 219 | 0.7432 | HOMO->L+2 (79%)  |
|                                                                                 | S19 | 6.4472 | 192 | 0.3406 | H-2->L+1 (37%)   |

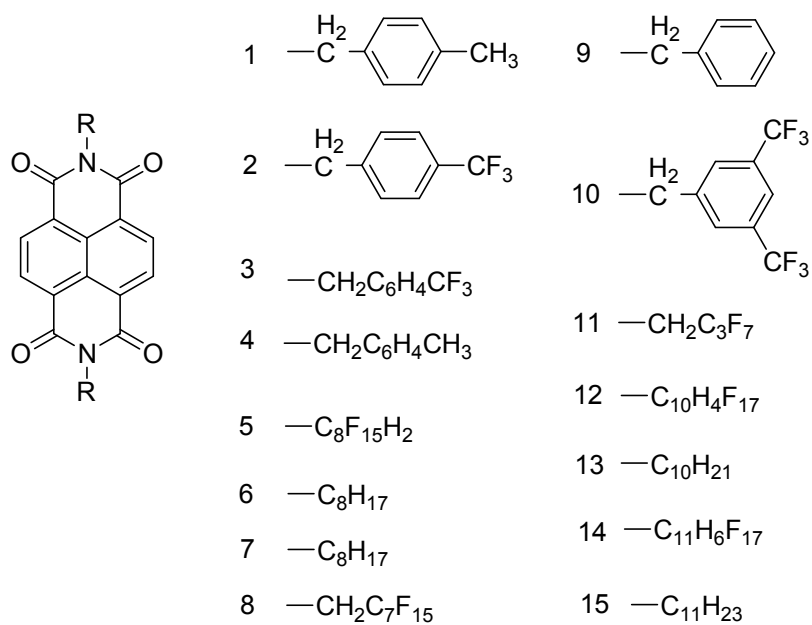

Figure. S8 Some naphthalene tetracarboxylic diimide (NDI) compounds reported earlier

Table S6 Mobility and LUMO energy level of NDI compounds in air reported earlier

| Compound | Mobility in air (cm <sup>2</sup> /Vs) | LUMO energy (eV) | Reference |
|----------|---------------------------------------|------------------|-----------|
| 1        | No mobility                           |                  | 9         |
| 2        | 0.12                                  |                  | 9         |
| 3        | 0.01                                  |                  | 10        |
| 4        | No mobility                           |                  | 10        |
| 5        | 0.01                                  |                  | 10        |
| 6        | 10 <sup>-6</sup>                      |                  | 10        |
| 7        | No mobility                           |                  | 11        |
| 8        | 0.1                                   |                  | 11        |
| 9        | 1.2x10 <sup>-3</sup>                  |                  | 12        |
| 10       | 1.2x10 <sup>-3</sup>                  |                  | 12        |
| 11       | 0.26±0.02                             | -3.72            | 13        |
| 12       | 0.029                                 | -3.77            | 14        |
| 13       | 0.32                                  | -3.64            | 15        |
| 14       | 0.38                                  | -3.71            | 15        |
| 15       | 0.15                                  | -3.64            | 15        |

The side chain engineering of rylene diimides (naphthalene diimide, NDI and perylene diimide, PDI) with fluoro groups can significantly increase the stability of the compound as self-segregation of fluoro groups occur followed by a densely packed structure. The movement of oxygen and moisture can be hindered through this densely packed structure<sup>15,16</sup>. Byung Jun Jung *et al* reported a series of naphthalene tetracarboxylic diimide based compounds with increasing fluoro groups in the side chain<sup>17</sup> as shown on the following Figure S9.

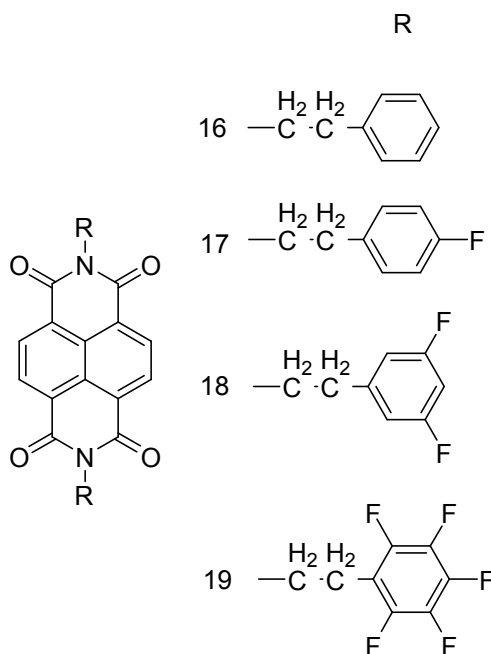

Fig. S9 A series of naphthalene tetracarboxylic diimide (NDI) compounds with increasing fluoro groups

In their work, the highest mobility observed for compound 19 is as high as  $0.064 \pm 0.017 \text{ cm}^2/\text{Vs}$  among the reported four compounds (**16**, **17**, **18**, **19**) due to the effect of larger number of fluoro groups. Brooks A. Jones *et al* have reported the air stability of NDI compound with fluoroalkyl side chain engineering as shown on the following Figure S10 with electron mobility of  $0.1 \text{ cm}^2/\text{Vs}$ <sup>18</sup> in air. Its N-alkyl derivative has no mobility due to its less densely packed structure and instability in air.

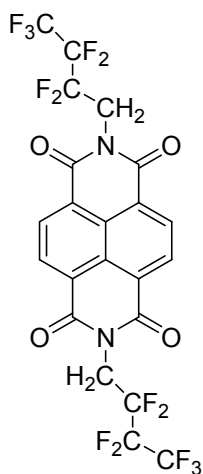

Fig. S10 NDI compound with fluoroalkyl side chain

## Reference:

- <sup>1</sup> G. R. Krishna, R. Devarapalli, G. Lal, and C. M. Reddy, Mechanically Flexible Organic Crystals Achieved by Introducing Weak Interactions in Structure: Supramolecular Shape Synthons, *J. Am. Chem. Soc.*, 2016, **138**, 13561–13567.
- <sup>2</sup> M. Pandeewar, H. Khare, S. Ramakumar and T. Govindaraju, Biomimetic molecular organization of naphthalene diimide in the solid state: tunable (chiro-) optical, viscoelastic and nanoscale properties, *RSC Adv.*, 2014, **4**, 20154–20163.
- <sup>3</sup> R. Devarapalli, S. B. Kadambi, C. T. Chen, G. R. Krishna, B. R. Kammari, M. J. Buehler, U. Ramamurty and C. Malla Reddy, Remarkably Distinct Mechanical Flexibility in Three Structurally Similar Semiconducting Organic Crystals Studied by Nanoindentation and Molecular Dynamics, *Chem. Mater.* 2019, **31**, 1391–1402.
- <sup>4</sup> X. Zhao, Y. Xiong, J. Ma, and Z. Yuan, Rylene and Rylene Diimides: Comparison of Theoretical and Experimental Results and Prediction for High-Rylene Derivatives, *J. Phys. Chem. A*, 2016, **120**, 7554–7560.
- <sup>5</sup> P. M. Alvey, J. J. Reczek, V. Lynch and B. L. Iverson, A Systematic Study of Thermochromic Aromatic Donor-Acceptor Materials, *J. Org. Chem.*, 2010, **75**, 7682–7690.
- <sup>6</sup> D. Shukla, M. Rajeswaran, W. G. Ahearn and D. M. Meyer, N,N-Bis(2,2,3,3,4,4,4 heptafluorobutyl)-naphthalene-1,4:5,8-tetracarboximide, *Acta Cryst.*, 2008, **E64**, o2327.
- <sup>7</sup> A. Lv, Y. Li, W. Yue, L. Jiang, H. Dong, G. Zhao, Q. Meng, W. Jiang, Y. He, Z. Li, Z. Wang and W. Hu, High performance n-type single crystalline transistors of naphthalene bis(dicarboximide) and their anisotropic transport in crystals, *Chem. Commun.*, 2012, **48**, 5154–5156.
- <sup>8</sup> J. H. Oh, S. L. Suraru, W. Y. Lee, M. Konemann, H. W. Hoffken, C. Roger, R. Schmidt, Y. Chung, W. C. Chen, F. Wurthner and Z. Bao, High-Performance Air-Stable n-Type Organic Transistors Based on Core-Chlorinated Naphthalene Tetracarboxylic Diimides, *Adv. Funct. Mater.*, 2010, **20**, 2148–2156
- <sup>9</sup> H. E. Katz, Theo Siegrist, J. Hendrik Schon, Christian Kloc, Bertram Batlogg, Andrew J. Lovinger, Jerainne Johnson, Solid-State Structural and Electrical Characterization of N-Benzyl and N-Alkyl Naphthalene 1,4,5,8-Tetracarboxylic Diimides, *Chem. Phys. Chem.* 2001, **2**, 167–172.
- <sup>10</sup> H. E. Katz, Jerainne Johnson,† Andrew J. Lovinger, and Wenjie Li, Naphthalenetetracarboxylic Diimide-Based n-Channel Transistor Semiconductors: Structural Variation and Thiol-Enhanced Gold Contacts, *J. Am. Chem. Soc.* 2000, **122**, 7787–7792.
- <sup>11</sup> H. E. Katz, A. J. Lovinger, J. Johnson, C. Kloc, T. Siegrist, W. Li, Y.-Y. Lin & A. Dodabalapur, A soluble and air-stable organic semiconductor with high electron mobility, *Nature*, 2000, **404**, 478–481.
- <sup>12</sup> Y. L. Lee, Hui-Lin Hsu, Szu-Ying Chen, and Tri-Rung Yew, Solution-Processed Naphthalene Diimide Derivatives as n-Type Semiconductor Materials, *J. Phys. Chem. C*, 2008, **112**, 1694–1699.
- <sup>13</sup> J. H. Oh, Sabin–Lucian Suraru, Wen-Ya Lee, Martin Konemann, Hans Wolfgang Hoffken, Cornelia Roger, Rudiger Schmidt, Yoonyoung Chung, Wen-Chang Chen, Frank Wurthner, Zhenan Bao, High-Performance Air-Stable n-Type Organic Transistors Based on Core-Chlorinated Naphthalene Tetracarboxylic Diimides, *Adv. Funct. Mater.* 2010, **20**, 2148–2156.
- <sup>14</sup> B. J. Jung, Kyusang Lee, Jia Sun, Andreas G. Andreou, Howard E. Katz, Air-Operable, High-Mobility Organic Transistors with Semifluorinated Side Chains and Unsubstituted Naphthalenetetracarboxylic Diimide Cores: High Mobility and Environmental and Bias Stress Stability from the Perfluorooctylpropyl Side Chain, *Adv. Funct. Mater.* 2010, **20**, 2930–2944.
- <sup>15</sup> R. Devarapalli, S. B. Kadambi, C. T. Chen, G. R. Krishna, B. R. Kammari, M. J. Buehler, U. Ramamurty and C. Malla Reddy, Remarkably Distinct Mechanical Flexibility in Three Structurally Similar Semiconducting Organic Crystals Studied by Nanoindentation and Molecular Dynamics, *Chem. Mater.* 2019, **31**, 1391–1402.
- <sup>16</sup> X. Chen, D. Zhang, Y. He, M. U. Ali, Y. Wu, C. Zhao, P. Wu, C. Yan, F. Wudl and H. Meng, Fluoro-alkyl Substituted Isothianaphthene Bisimides as Stable n-Type Semiconductors, *Mater. Chem. Front.*, 2020, <https://doi.org/10.1039/D0QM00137F>.
- <sup>17</sup> Byung Jun Jung, Jia Sun, Taegweon Lee, Amy Sarjeant, and Howard E. Katz, Low-Temperature-Processible, Transparent, and Air-Operable n-Channel Fluorinated Phenylethylated Naphthalenetetracarboxylic Diimide Semiconductors Applied to Flexible Transistors, *Chem. Mater.* 2009, **21**, 94–101.
- <sup>18</sup> Brooks A. Jones, Michael J. Ahrens, Myung-Han Yoon, Antonio Facchetti, Tobin J. Marks, and Michael R. Wasielewski, High-Mobility Air-Stable n-Type Semiconductors with Processing Versatility: Dicyanoperylene- 3,4:9,10-bis(dicarboximides), *Angew. Chem. Int. Ed.* 2004, **43**, 6363 –6366.
